# Supplementary material
Source: PubMed Central journal article supplement (PMC524852)
Supplement: pnas_101_44_15670__1.pdf [file pnas_101_44_15670__1.pdf]

**Table 2. *A. thaliana* ecotypes used in *FLC* analyses**

| ABRC accession | Name         | Origin                                 | <i>FLC</i>                    |                               |                      |
|----------------|--------------|----------------------------------------|-------------------------------|-------------------------------|----------------------|
|                |              |                                        | <i>FRI</i> genotype           | haplotype group               | Insertion            |
| <b>CS20*</b>   | <b>Ler-0</b> | <b>Landsberg an der Warthe, Poland</b> | <b><i>FRI</i><sup>A</sup></b> | <b><i>FLC</i><sup>A</sup></b> | <b>Ler-type</b>      |
| CS163          | Ler-0        | Landsberg an der Warthe, Poland        | <i>FRI</i> <sup>A</sup>       | <i>FLC</i> <sup>A</sup>       | Ler-type             |
| CS901          | Ag-0         | Argentat, France                       | <i>FRI</i>                    | <i>FLC</i> <sup>A</sup>       |                      |
| <b>CS902</b>   | <b>Cvi-0</b> | <b>Cape Verde Islands</b>              |                               | <b><i>FLC</i><sup>A</sup></b> |                      |
| <b>CS903</b>   | <b>Kas-1</b> | <b>Kashmir, India</b>                  |                               | <b><i>FLC</i><sup>B</sup></b> |                      |
| CS906          | C24          |                                        | <i>FRI</i>                    | <i>FLC</i> <sup>A</sup>       |                      |
| CS907          | Col-2        |                                        | <i>FRI</i> <sup>A</sup>       | <i>FLC</i> <sup>A</sup>       | Col-type             |
| CS908          | Col-3        |                                        | <i>FRI</i> <sup>A</sup>       | <i>FLC</i> <sup>A</sup>       | Col-type             |
| CS910*         | Di-G         | Dijon, France                          | <i>FRI</i> <sup>A</sup>       | <i>FLC</i> <sup>A</sup>       | Ler-type             |
| CS913*         | RLD1         | Rshew, Russia                          | <i>FRI</i> <sup>A</sup>       | <i>FLC</i> <sup>B</sup>       |                      |
| CS914          | S96          | Netherlands                            | <i>FRI</i>                    | <i>FLC</i> <sup>A</sup>       | Da-type and Col-type |
| <b>CS915</b>   | <b>Ws</b>    | <b>Wassilewskija, Russia</b>           | <b><i>FRI</i><sup>A</sup></b> | <b><i>FLC</i><sup>B</sup></b> |                      |
| CS917*         | Da(1)-12     | Czechoslovakia                         | <i>FRI</i>                    | <i>FLC</i> <sup>A</sup>       | Da-type and Col-type |
| CS919          | Di-M         | Moscow University, Russia              |                               | <i>FLC</i> <sup>B</sup>       |                      |
| CS920          | En-D         | Donetsk University, Ukraine            | <i>FRI</i> <sup>A</sup>       | <i>FLC</i> <sup>B</sup>       |                      |
| CS923          | H55          | Czechoslovakia                         | <i>FRI</i> <sup>A</sup>       | <i>FLC</i> <sup>A</sup>       |                      |
| CS924*         | Je54         | Czechoslovakia                         |                               | <i>FLC</i> <sup>B</sup>       |                      |
| CS925          | Litva        | Lithuania                              | <i>FRI</i>                    | <i>FLC</i> <sup>A</sup>       |                      |
| CS926          | Petergof     | Petergof, Russia                       | <i>FRI</i> <sup>A</sup>       | <i>FLC</i> <sup>B</sup>       |                      |
| CS927          | Rubezhnoe-1  | Rubezhnoe, Ukraine                     |                               | <i>FLC</i> <sup>B</sup>       |                      |
| CS928          | Rubezhnoe-2  | Rubezhnoe, Ukraine                     | <i>FRI</i>                    | <i>FLC</i> <sup>B</sup>       |                      |
| CS931*         | Sorbo        | Tadzhikistan                           | <i>FRI</i>                    | <i>FLC</i> <sup>B</sup>       |                      |
| CS932          | Abd-0        | Kingswells, Aberdeen, U.K.             | <i>FRI</i> <sup>A</sup>       | <i>FLC</i> <sup>A</sup>       |                      |
| CS933          | Col-4        | Landsberg an der Warthe, Poland        | <i>FRI</i> <sup>A</sup>       | <i>FLC</i> <sup>A</sup>       | Col-type             |
| <b>CS970</b>   | <b>Bla-1</b> | <b>Blanes/Gerona, Spain</b>            |                               | <b><i>FLC</i><sup>A</sup></b> |                      |
| <b>CS996</b>   | <b>Bs-1</b>  | <b>Basel, Switzerland</b>              |                               | <b><i>FLC</i><sup>B</sup></b> |                      |
| <b>CS1074</b>  | <b>Chi-1</b> | <b>Chisdra, Russia</b>                 |                               | <b><i>FLC</i><sup>A</sup></b> |                      |
| <b>CS1084</b>  | <b>Co-1</b>  | <b>Coimbra, Portugal</b>               |                               | <b><i>FLC</i><sup>A</sup></b> |                      |
| CS1092         | Col-0        | Landsberg an der Warthe, Poland        | <i>FRI</i> <sup>A</sup>       | <i>FLC</i> <sup>A</sup>       | Col-type             |
| <b>CS1244</b>  | <b>Ita-0</b> | <b>Ibel Tazekka, Morocco</b>           |                               | <b><i>FLC</i><sup>A</sup></b> |                      |
| <b>CS1316</b>  | <b>Li-3</b>  | <b>Limburg, Germany</b>                | <b><i>FRI</i><sup>A</sup></b> | <b><i>FLC</i><sup>B</sup></b> |                      |
| CS1328         | Li-6:1       | Limburg, Germany                       | <i>FRI</i>                    | <i>FLC</i> <sup>A</sup>       | Col-type             |
| <b>CS1332</b>  | <b>Li-8</b>  | <b>Limburg, Germany</b>                |                               | <b><i>FLC</i><sup>B</sup></b> |                      |
| CS1352*        | Lu-1         | Lund, Sweden                           | <i>FRI</i>                    | <i>FLC</i> <sup>B</sup>       |                      |
| CS1364*        | Me-0         | Mechtshausen/Hessen, Germany           | <i>FRI</i> <sup>A</sup>       | <i>FLC</i> <sup>A</sup>       | Col-type             |
| CS1540*        | Su-0         | Southport, U.K.                        | <i>FRI</i>                    | <i>FLC</i> <sup>B</sup>       |                      |

|         |        |                                 |                  |                  |          |
|---------|--------|---------------------------------|------------------|------------------|----------|
| CS1602* | Ws-0   | Wassilewskija, Russia           | FRI              | FLC <sup>A</sup> |          |
| CS2223  | Ws-1   | Wassilewskija, Russia           | FRI <sup>A</sup> | FLC <sup>B</sup> |          |
| CS2360  | Ws-2   | Wassilewskija, Russia           | FRI <sup>A</sup> | FLC <sup>B</sup> |          |
| CS3081  | No-0   | Nossen, Germany                 | FRI <sup>A</sup> | FLC <sup>A</sup> | †        |
| CS3109  | Ber,   | Copenhagen, Denmark             | FRI <sup>A</sup> | FLC <sup>A</sup> | †        |
| CS3176  | Col-1  | Landsberg an der Warthe, Poland | FRI <sup>A</sup> | FLC <sup>A</sup> | Col-type |
| CS3178  | Li-5,  | Limburg, Germany                | FRI <sup>A</sup> | FLC <sup>A</sup> | Col-type |
| CS3180  | Co     | Coimbra, Portugal               |                  | FLC <sup>A</sup> |          |
| CS6042  | PHW-1  | Corscalla, Italy                | FRI              | FLC <sup>A</sup> |          |
| CS6043  | PHW-1  | Corscalla, Italy                | FRI              | FLC <sup>A</sup> |          |
| CS6044  | PHW-2  | Florence, Italy                 | FRI              | FLC <sup>A</sup> |          |
| CS6045  | PHW-3  | Koln, Germany                   | FRI <sup>A</sup> | FLC <sup>B</sup> |          |
| CS6046  | PHW-3  | Koln, Germany                   | FRI <sup>A</sup> | FLC <sup>B</sup> |          |
| CS6047  | PHW-4  | Maidstone, Kent, U.K.           | FRI <sup>A</sup> | FLC <sup>A</sup> |          |
| CS6048  | PHW-5  | Kent, U.K.                      | FRI <sup>A</sup> | FLC <sup>A</sup> |          |
| CS6049  | PHW-6  | Kent, U.K.                      | FRI <sup>A</sup> | FLC <sup>A</sup> |          |
| CS6050  | PHW-6  | Kent, U.K.                      | FRI <sup>A</sup> | FLC <sup>A</sup> |          |
| CS6051  | PHW-7  | Kent, U.K.                      | FRI <sup>A</sup> | FLC <sup>A</sup> |          |
| CS6052  | PHW-7  | Kent, U.K.                      | FRI <sup>A</sup> | FLC <sup>A</sup> |          |
| CS6058  | PHW-11 | Kent, U.K.                      | FRI              | FLC <sup>A</sup> |          |
| CS6059  | PHW_12 | Kent, U.K.                      | FRI              | FLC <sup>A</sup> |          |
| CS6060  | PHW-13 | West Malling, Kent, U.K.        | FRI              | FLC <sup>A</sup> |          |
| CS6061  | PHW-14 | Kent, U.K.                      | FRI <sup>A</sup> | FLC <sup>A</sup> |          |
| CS6062  | PHW-15 | West Malling, Kent, U.K.        | FRI <sup>A</sup> | FLC <sup>A</sup> |          |
| CS6063  | PHW-15 | West Malling, Kent, U.K.        | FRI <sup>A</sup> | FLC <sup>A</sup> |          |
| CS6064  | PHW-16 | Maidstone, Kent, U.K.           | FRI              | FLC <sup>A</sup> |          |
| CS6065  | PHW-16 | Maidstone, Kent, U.K.           | FRI              | FLC <sup>A</sup> |          |
| CS6066  | PHW-17 | Kent, U.K.                      |                  | FLC <sup>A</sup> |          |
| CS6067  | PHW-17 | Kent, U.K.                      | FRI              | FLC <sup>A</sup> |          |
| CS6068  | PHW-18 | Kent, U.K.                      | FRI              | FLC <sup>A</sup> |          |
| CS6069  | PHW-18 | Kent, U.K.                      | FRI              | FLC <sup>A</sup> |          |
| CS6070  | PHW-19 | Kent, U.K.                      | FRI              | FLC <sup>A</sup> |          |
| CS6071  | PHW-20 | Kent, U.K.                      | FRI              | FLC <sup>A</sup> |          |
| CS6072  | PHW-20 | Kent, U.K.                      | FRI              | FLC <sup>A</sup> |          |
| CS6073  | PHW-21 | Kent, U.K.                      | FRI <sup>A</sup> | FLC <sup>A</sup> |          |
| CS6074  | PHW-21 | Kent, U.K.                      | FRI              | FLC <sup>A</sup> |          |
| CS6075  | PHW-22 | Marlborough, U.K.               | FRI              | FLC <sup>A</sup> |          |
| CS6076  | PHW-22 | Marlborough, U.K.               | FRI              | FLC <sup>A</sup> |          |
| CS6077  | PHW-23 | Sidmouth, Devon, U.K.           | FRI              | FLC <sup>A</sup> |          |
| CS6078  | PHW-24 | Sidmouth, Devon, U.K.           | FRI <sup>A</sup> | FLC <sup>A</sup> |          |
| CS6079  | PHW-25 | Sidmouth, Devon, U.K.           | FRI <sup>A</sup> | FLC <sup>A</sup> |          |
| CS6083  | PHW-28 | Dartmode, Devon, U.K.           | FRI              | FLC <sup>A</sup> |          |

|               |                |                                      |                  |                        |          |
|---------------|----------------|--------------------------------------|------------------|------------------------|----------|
| CS6084        | PHW-28         | Dartmode, Devon, U.K.                | FRI              | FLC <sup>A</sup>       |          |
| CS6085        | PHW-29         | Chagford, Devon, U.K.                | FRI              | FLC <sup>A</sup>       |          |
| CS6087        | PHW-30         | ReDding, Hampshire, U.K.             | FRI              | FLC <sup>B</sup>       |          |
| CS6090        | PHW-32         | Lisse, Keukenhof, Netherlands        | FRI              | FLC <sup>B</sup>       | †        |
| CS6091        | PHW-32         | Lisse, Keukenhof, Netherlands        | FRI              | FLC <sup>B</sup>       |          |
| <b>CS6092</b> | <b>PHW-33</b>  | <b>Lisse, Keukenhof, Netherlands</b> | <b>FRI</b>       | <b>FLC<sup>B</sup></b> |          |
| CS6093        | PHW-33         | Lisse, Keukenhof, Netherlands        | FRI              | FLC <sup>B</sup>       |          |
| CS6095        | PHW-34         | Bretagny Sur Orge, France            | FRI              | FLC <sup>A</sup>       | Col-type |
| <b>CS6096</b> | <b>PHW-35</b>  | <b>Bretagny Sur Orge, France</b>     |                  | <b>FLC<sup>A</sup></b> |          |
| CS6097        | PHW-35         | Bretagny Sur Orge, France            | FRI              | FLC <sup>A</sup>       | Col-type |
| CS6098        | PHW-36         | Bretagny Sur Orge, France            | FRI              | FLC <sup>A</sup>       | Col-type |
| CS6099        | PHW-37         | Bretagny Sur Orge, France            | FRI              | FLC <sup>B</sup>       |          |
| CS6100        | Kelsterbach-1  | Kelsterbach, Germany                 | FRI <sup>A</sup> | FLC <sup>B</sup>       |          |
| CS6101        | Kelsterbach-1  | Kelsterbach, Germany                 | FRI              | FLC <sup>B</sup>       |          |
| CS6102        | Kelsterbach-2  | Kelsterbach, Germany                 | FRI <sup>A</sup> | FLC <sup>B</sup>       |          |
| CS6103        | Kelsterbach-3  | Kelsterbach, Germany                 | FRI <sup>A</sup> | FLC <sup>B</sup>       |          |
| CS6104        | Kelsterbach-3  | Kelsterbach, Germany                 | FRI <sup>A</sup> | FLC <sup>B</sup>       |          |
| CS6105        | Kelsterbach-4  | Kelsterbach, Germany                 | FRI <sup>A</sup> | FLC <sup>B</sup>       |          |
| CS6173*       | Est            | Germany                              | FRI              | FLC <sup>A</sup>       |          |
| CS6175        | Kondara        | Kondara, Tadjhikistan                | FRI              | FLC <sup>B</sup>       | †        |
| CS6176*       | En-T           | Acad. Sci., Tadjhikistan             | FRI <sup>A</sup> | FLC <sup>B</sup>       |          |
| CS6178*       | Hodja-Obi-Garm | Tadjhikistan                         | FRI              | FLC <sup>B</sup>       |          |
| CS6180*       | Shahdara       | Pamiro-Alaya, Tadjhikistan           | FRI              | FLC <sup>B</sup>       |          |
| CS6181        | Sn(5)-1        | Czechoslovakia                       | FRI <sup>A</sup> | FLC <sup>A</sup>       |          |
| CS6182*       | Wei-0          | Weiningen, Switzerland               | FRI <sup>A</sup> | FLC <sup>A</sup>       |          |
| CS6184        | M7323S         |                                      | FRI <sup>A</sup> | FLC <sup>A</sup>       |          |
| CS6185        | M7884S         |                                      | FRI              | FLC <sup>A</sup>       | Col-type |
| CS6188        | Seattle-0      | Seattle, Washington, USA             | FRI              | FLC <sup>A</sup>       |          |
| CS6600*       | Aa-0           | Aua/Rhon, Germany                    | FRI <sup>A</sup> | FLC <sup>B</sup>       |          |
| CS6602*       | Ak-1           | Achkarren/Freiburg, Germany          | FRI <sup>A</sup> | FLC <sup>A</sup>       |          |
| CS6603        | An-1           | Antwerpen, Belgium                   | FRI <sup>A</sup> | FLC <sup>A</sup>       |          |
| CS6604*       | An-2           | Antwerpen, Belgium                   | FRI <sup>A</sup> | FLC <sup>B</sup>       |          |
| CS6605        | Ang-0          | Angleur, Prov. de Liege, Belgium     | FRI <sup>A</sup> | FLC <sup>B</sup>       |          |
| CS6606        | Ang-1          | Angleur, Prov. de Liege, Belgium     | FRI              | FLC <sup>A</sup>       |          |
| CS6608        | Bay-0          | Bayreuth, Germany                    | FRI <sup>A</sup> | FLC <sup>B</sup>       |          |
| CS6609*       | Bch-1          | Buchen/Lauenburg, Germany            |                  | FLC <sup>A</sup>       |          |
| CS6610        | Bch-3          | Buchen/Lauenburg, Germany            | FRI <sup>A</sup> | FLC <sup>B</sup>       |          |
| CS6611        | Bch-4          | Buchen/Lauenburg, Germany            | FRI <sup>A</sup> | FLC <sup>A</sup>       |          |
| CS6612        | Bd-0           | Berlin/Dahlem, Germany               | FRI              | FLC <sup>B</sup>       |          |
| CS6614        | Be-1           | Bensheim/Bergstr., Germany           | FRI <sup>A</sup> | FLC <sup>B</sup>       |          |
| CS6615*       | Bl-1           | Bologna, Italy                       | FRI              | FLC <sup>B</sup>       |          |

|         |        |                                 |                  |                  |          |
|---------|--------|---------------------------------|------------------|------------------|----------|
| CS6616* | Bla-1  | Blanes/Gerona, Spain            | FRI              | FLC <sup>A</sup> | †        |
| CS6617  | Bla-2  | Blanes/Gerona, Spain            | FRI              | FLC <sup>A</sup> |          |
| CS6618  | Bla-3  | Blanes/Gerona, Spain            | FRI              | FLC <sup>A</sup> |          |
| CS6619  | Bla-4  | Blanes/Gerona, Spain            | FRI <sup>A</sup> | FLC <sup>B</sup> |          |
| CS6621  | Bla-6  | Blanes/Gerona, Spain            | FRI              | FLC <sup>A</sup> |          |
| CS6622* | Bla-10 | Blanes/Gerona, Spain            | FRI              | FLC <sup>A</sup> |          |
| CS6623  | Bla-11 | Blanes/Gerona, Spain            | FRI              | FLC <sup>A</sup> |          |
| CS6624  | Bla-12 | Blanes, Spain                   | FRI <sup>A</sup> | FLC <sup>A</sup> | Col-type |
| CS6626* | Br-0   | Brunn, Brno, Czechoslovakia     | FRI              | FLC <sup>A</sup> |          |
| CS6627* | Bs-1   | Basel, Switzerland              | FRI <sup>A</sup> | FLC <sup>B</sup> |          |
| CS6628  | Bs-2   | Basel, Switzerland              | FRI <sup>A</sup> | FLC <sup>B</sup> |          |
| CS6629  | Bs-5   | Basel, Switzerland              | FRI <sup>A</sup> | FLC <sup>A</sup> |          |
| CS6630* | Bsch-0 | Buchschlag/FFM, Germany         | FRI <sup>A</sup> | FLC <sup>B</sup> |          |
| CS6631  | Bsch-2 | Buchschlag/FFM, Germany         | FRI <sup>A</sup> | FLC <sup>B</sup> |          |
| CS6632* | Bu-0   | Burghaun/Rhon, Germany          | FRI <sup>A</sup> | FLC <sup>A</sup> |          |
| CS6633  | Bu-2   | Burghaun/Rhon, Germany          |                  | FLC <sup>A</sup> | †        |
| CS6634  | Bu-3   | Burghaun/Rhon, Germany          | FRI <sup>A</sup> | FLC <sup>B</sup> |          |
| CS6636  | Bu-5   | Burghaun/Rhon, Germany          |                  | FLC <sup>B</sup> |          |
| CS6637  | Bu-6   | Burghaun/Rhon, Germany          | FRI <sup>A</sup> | FLC <sup>A</sup> |          |
| CS6639  | Bu-8   | Burghaun/Rhon, Germany          | FRI <sup>A</sup> | FLC <sup>B</sup> |          |
| CS6640  | Bu-9   | Burghaun/Rhon, Germany          | FRI <sup>A</sup> | FLC <sup>B</sup> |          |
| CS6641  | Bu-11  | Burghaun/Rhon, Germany          | FRI <sup>A</sup> | FLC <sup>A</sup> |          |
| CS6642  | Bu-13  | Burghaun/Rhon, Germany          | FRI <sup>A</sup> | FLC <sup>B</sup> |          |
| CS6646  | Bu-14  | Burghaun/Rhon, Germany          | FRI <sup>A</sup> | FLC <sup>A</sup> | †        |
| CS6647  | Bu-15  | Burghaun/Rhon, Germany          | FRI <sup>A</sup> | FLC <sup>A</sup> |          |
| CS6648  | Bu-17  | Burghaun/Rhon, Germany          | FRI <sup>A</sup> | FLC <sup>A</sup> | Col-type |
| CS6650  | Bu-19  | Burghaun/Rhon, Germany          | FRI <sup>A</sup> | FLC <sup>B</sup> |          |
| CS6651  | Bu-20  | Burghaun/Rhon, Germany          | FRI <sup>A</sup> | FLC <sup>A</sup> |          |
| CS6652  | Bu-21  | Burghaun/Rhon, Germany          | FRI <sup>A</sup> | FLC <sup>B</sup> |          |
| CS6653  | Bu-22  | Burghaun/Rhon, Germany          | FRI <sup>A</sup> | FLC <sup>A</sup> |          |
| CS6654  | Bu-23  | Burghaun/Rhon, Germany          | FRI <sup>A</sup> | FLC <sup>B</sup> |          |
| CS6655  | Bu-24  | Burghaun/Rhon, Germany          | FRI <sup>A</sup> | FLC <sup>B</sup> |          |
| CS6656  | Bu-25  | Burghaun/Rhon, Germany          | FRI <sup>A</sup> | FLC <sup>B</sup> |          |
| CS6658* | Ca-0   | Camberg/Taunus, Germany         | FRI <sup>A</sup> | FLC <sup>B</sup> |          |
| CS6659* | Cal-0  | Calver, U.K.                    | FRI              | FLC <sup>A</sup> |          |
| CS6664  | Chi-0  | Chisdra, Russia                 | FRI              | FLC <sup>A</sup> |          |
| CS6665* | Chi-1  | Chisdra, Russia                 | FRI              | FLC <sup>A</sup> |          |
| CS6668  | Cl-0   |                                 | FRI <sup>A</sup> | FLC <sup>A</sup> | Col-type |
| CS6669* | Co-1   | Coimbra, Portugal               | FRI              | FLC <sup>A</sup> |          |
| CS6671  | Co-3   | Coimbra, Portugal               | FRI              | FLC <sup>A</sup> |          |
| CS6672  | Co-4   | Coimbra, Portugal               | FRI              | FLC <sup>A</sup> |          |
| CS6673  | Col-0  | Landsberg an der Warthe, Poland | FRI <sup>A</sup> | FLC <sup>A</sup> | Col-type |

|         |       |                             |                  |                  |                      |
|---------|-------|-----------------------------|------------------|------------------|----------------------|
| CS6676  | Da-0  | Darmstadt, Germany          | FRI <sup>A</sup> | FLC <sup>B</sup> |                      |
| CS6677  | Db-0  | Dombachtal/Ts., Germany     | FRI <sup>A</sup> | FLC <sup>B</sup> |                      |
| CS6678* | Db-1  | Tenne/Ts., Germany          | FRI <sup>A</sup> | FLC <sup>B</sup> |                      |
| CS6679  | Db-2  | Dombachtal/Ts., Germany     | FRI <sup>A</sup> | FLC <sup>B</sup> |                      |
| CS6680  | Di-0  | Dijon, France               | FRI              | FLC <sup>A</sup> |                      |
| CS6681* | Di-1  | Dijon, France               | FRI <sup>A</sup> | FLC <sup>B</sup> |                      |
| CS6682  | Di-2  | Dijon, France               | FRI <sup>A</sup> | FLC <sup>A</sup> | Ler-type             |
| CS6683* | Do-0  | Donsbach/Westerw., Germany  | FRI              | FLC <sup>B</sup> |                      |
| CS6684* | Dr-0  | Dresden, Germany            | FRI <sup>A</sup> | FLC <sup>B</sup> |                      |
| CS6685  | Dra-0 | Drahonin, Czechoslovakia    | FRI              | FLC <sup>A</sup> | † and Col-type       |
| CS6686  | Dra-1 | Drahonin, Czechoslovakia    | FRI <sup>A</sup> | FLC <sup>A</sup> |                      |
| CS6687  | Dra-2 | Drahonin, Czechoslovakia    |                  | FLC <sup>A</sup> |                      |
| CS6688* | Edi-0 | Edinburgh, UK               | FRI              | FLC <sup>B</sup> |                      |
| CS6689  | Ei-2  | Eifel, Germany              | FRI              | FLC <sup>A</sup> | Col-type             |
| CS6690  | Ei-4  | Eifel, Germany              | FRI              | FLC <sup>A</sup> | Da-type and Col-type |
| CS6692  | Ei-6  | Eifel, Germany              | FRI <sup>A</sup> | FLC <sup>B</sup> |                      |
| CS6693* | Eil-0 | Eilenburg, Germany          | FRI <sup>A</sup> | FLC <sup>A</sup> | †                    |
| CS6694* | El-0  | Ellershausen, Germany       | FRI <sup>A</sup> | FLC <sup>B</sup> |                      |
| CS6695* | En-1  | Enkheim/Frankfurt, Germany  | FRI <sup>A</sup> | FLC <sup>B</sup> |                      |
| CS6698  | Er-0  | Erlangen, Germany           | FRI <sup>A</sup> | FLC <sup>A</sup> |                      |
| CS6700  | Est-0 | Estland, Russia             | FRI              | FLC <sup>A</sup> |                      |
| CS6703* | Fe-1  | Freiburg, Germany           | FRI <sup>A</sup> | FLC <sup>B</sup> |                      |
| CS6704* | Fi-0  | Frickhofen, Germany         | FRI <sup>A</sup> | FLC <sup>A</sup> | † and Col-type       |
| CS6705  | Fi-1  | Frickhofen, Germany         | FRI <sup>A</sup> | FLC <sup>B</sup> |                      |
| CS6708  | Fr-2  | Frankfurt, Germany          | FRI <sup>A</sup> | FLC <sup>B</sup> |                      |
| CS6709  | Fr-3  | Frankfurt, Germany          | FRI <sup>A</sup> | FLC <sup>B</sup> |                      |
| CS6710  | Fr-4  | Frankfurt, Germany          | FRI <sup>A</sup> | FLC <sup>B</sup> |                      |
| CS6712  | Fr-6  | Frankfurt/Ginnheim, Germany | FRI <sup>A</sup> | FLC <sup>A</sup> | Col-type             |
| CS6713  | Fr-7  | Frankfurt, Germany          | FRI <sup>A</sup> | FLC <sup>B</sup> |                      |
| CS6714* | Ga-0  | Gabelstein, Germany         | FRI <sup>A</sup> | FLC <sup>A</sup> |                      |
| CS6718  | Ge-1  | Geneva, Switzerland         | FRI <sup>A</sup> | FLC <sup>B</sup> |                      |
| CS6720* | Gie-0 | Gieben, Germany             | FRI <sup>A</sup> | FLC <sup>B</sup> |                      |
| CS6722  | Go-2  | Goettingen, Germany         | FRI <sup>A</sup> | FLC <sup>B</sup> |                      |
| CS6723  | Gr-1  | Graz, Austria               | FRI <sup>A</sup> | FLC <sup>A</sup> | †                    |
| CS6725  | Gr-3  | Graz, Austria               |                  | FLC <sup>A</sup> | Da-type and Col-type |
| CS6726  | Gr-4  | Graz, Austria               | FRI              | FLC <sup>A</sup> | Col-type             |
| CS6727  | Gr-5  | Graz, Austria               |                  | FLC <sup>B</sup> |                      |
| CS6728  | Gr-6  | Graz, Austria               | FRI              | FLC <sup>B</sup> |                      |

|         |        |                                 |                  |                  |                      |
|---------|--------|---------------------------------|------------------|------------------|----------------------|
| CS6730  | Gu-0   | Gluckingen, Germany             | FRI <sup>A</sup> | FLC <sup>B</sup> |                      |
| CS6731  | Gu-1   | Gluckingen, Germany             | FRI <sup>A</sup> | FLC <sup>B</sup> |                      |
| CS6732* | Gy-0   | La Miniere, France              | FRI <sup>A</sup> | FLC <sup>A</sup> |                      |
| CS6733  | Ha-0   | Hannover, Germany               | FRI <sup>A</sup> | FLC <sup>A</sup> |                      |
| CS6736  | Hi-0   | Hilversum, Netherlands          | FRI <sup>A</sup> | FLC <sup>B</sup> |                      |
| CS6738  | Hl-2   | Holtensen, Germany              | FRI <sup>A</sup> | FLC <sup>B</sup> |                      |
| CS6739* | Hn-0   | Hennetalsperre, Germany         | FRI <sup>A</sup> | FLC <sup>B</sup> |                      |
| CS6741  | Is-0   | Isenburg/Neuwied, Germany       | FRI <sup>A</sup> | FLC <sup>B</sup> |                      |
| CS6742  | Je-0   | Jena, Germany                   | FRI              | FLC <sup>A</sup> | †                    |
| CS6743  | Jl-1   | Vranov u Brno, Czech Repub.     |                  | FLC <sup>A</sup> |                      |
| CS6744  | Jl-2   | Vranov u Brno, Czech Repub.     | FRI              | FLC <sup>A</sup> |                      |
| CS6745* | Jl-3   | Vranov u Brno, Czech Repub.     | FRI <sup>A</sup> | FLC <sup>A</sup> | Da-type and Col-type |
| CS6746  | Jl-4   | Vranov u Brno, Czech Repub.     |                  | FLC <sup>A</sup> |                      |
| CS6747  | Jl-5   | Vranov u Brno, Czech Repub.     | FRI              | FLC <sup>A</sup> |                      |
| CS6748* | Jm-0   | Jamolice, Czechoslovakia        | FRI <sup>A</sup> | FLC <sup>B</sup> |                      |
| CS6749  | Jm-1   | Jamolice, Czechoslovakia        | FRI <sup>A</sup> | FLC <sup>A</sup> |                      |
| CS6750  | Jm-2   | Jamolice, Czechoslovakia        | FRI <sup>A</sup> | FLC <sup>A</sup> |                      |
| CS6751  | Kas-1  | Kashmir, India                  | FRI              | FLC <sup>B</sup> |                      |
| CS6752* | Ka-0   | Karnten, Austria                | FRI <sup>A</sup> | FLC <sup>A</sup> |                      |
| CS6753* | Kb-0   | Kronberg/Taunus, Germany        | FRI <sup>A</sup> | FLC <sup>A</sup> | Col-type             |
| CS6754* | Kil-0  | Killean, UK                     | FRI <sup>A</sup> | FLC <sup>B</sup> |                      |
| CS6755  | Kin-0  | Kindalville, MI, USA            | FRI              | FLC <sup>A</sup> |                      |
| CS6756* | Kl-0   | Koeln, Germany                  | FRI <sup>A</sup> | FLC <sup>B</sup> |                      |
| CS6757  | Kl-1   | Koeln, Germany                  | FRI <sup>A</sup> | FLC <sup>B</sup> |                      |
| CS6760  | Kl-4   | Koeln, Germany                  | FRI <sup>A</sup> | FLC <sup>B</sup> |                      |
| CS6761* | Kl-5   | Koeln, Germany                  | FRI <sup>A</sup> | FLC <sup>A</sup> | Col-type             |
| CS6762  | Kn-0   | Kaunas, Lithuania               | FRI              | FLC <sup>B</sup> |                      |
| CS6764* | Kr-0   | Krefeld, Germany                | FRI <sup>A</sup> | FLC <sup>B</sup> |                      |
| CS6765  | La-0   | Landsberg an der Warthe, Poland | FRI <sup>A</sup> | FLC <sup>B</sup> |                      |
| CS6766* | Kro-0  | Krotzenburg, Germany            | FRI <sup>A</sup> | FLC <sup>B</sup> |                      |
| CS6767  | Lan-0  | Lanark, U.K.                    | FRI              | FLC <sup>A</sup> | Col-type             |
| CS6768* | Lan-0  | Lanark, U.K.                    |                  | FLC <sup>A</sup> | Col-type             |
| CS6770* | Le-0   | Leiden, Netherlands             | FRI              | FLC <sup>B</sup> |                      |
| CS6771  | Li-1   | Limburg, Germany                | FRI <sup>A</sup> | FLC <sup>B</sup> |                      |
| CS6772  | Li-2:1 | Limburg, Germany                | FRI              | FLC <sup>A</sup> | Da-type and Col-type |
| CS6775* | Li-5   | Limburg, Germany                | FRI <sup>A</sup> | FLC <sup>A</sup> | Col-type             |
| CS6777  | Li-6   | Limburg, Germany                | FRI              | FLC <sup>A</sup> |                      |
| CS6778  | Li-7   | Limburg, Germany                | FRI <sup>A</sup> | FLC <sup>B</sup> |                      |
| CS6779  | Li-8   | Limburg, Germany                | FRI <sup>A</sup> | FLC <sup>B</sup> |                      |
| CS6780* | Lip-0  | Lipowiec/Chrzanow, Poland       |                  | FLC <sup>A</sup> |                      |

|         |       |                             |                  |                  |          |
|---------|-------|-----------------------------|------------------|------------------|----------|
| CS6781  | Ll-0  | Llagostera, Spain           | FRI              | FLC <sup>A</sup> |          |
| CS6782  | Ll-1  | Llagostera, Spain           | FRI              | FLC <sup>A</sup> | †        |
| CS6783  | Ll-2  | Llagostera, Spain           | FRI              | FLC <sup>A</sup> | †        |
| CS6784* | Lm-2  | Le Mans, France             | FRI <sup>A</sup> | FLC <sup>A</sup> | Col-type |
| CS6785  | Lo-1  | Lorrach, Germany            | FRI <sup>A</sup> | FLC <sup>B</sup> |          |
| CS6786* | Lo-2  | Lorrach, Germany            | FRI <sup>A</sup> | FLC <sup>B</sup> |          |
| CS6787  | Loh-0 | Limburg, Germany            |                  | FLC <sup>A</sup> |          |
| CS6788  | Lz-0  | Lezoux, Puy-de-Dome, France | FRI <sup>A</sup> | FLC <sup>A</sup> | Col-type |
| CS6789* | Ma-0  | Marburg/Lahn, Germany       | FRI <sup>A</sup> | FLC <sup>A</sup> | Col-type |
| CS6790  | Ma-2  | Marburg/Lahn, Germany       | FRI <sup>A</sup> | FLC <sup>B</sup> |          |
| CS6792* | Mh-0  | Muhlen, Poland              | FRI <sup>A</sup> | FLC <sup>B</sup> |          |
| CS6793  | Mh-1  | Muhlen, Poland              | FRI <sup>A</sup> | FLC <sup>B</sup> |          |
| CS6796* | Mrk-0 | Markt/Baden, Germany        | FRI <sup>A</sup> | FLC <sup>B</sup> | †        |
| CS6797* | Ms-0  | Moscow, Russia              |                  | FLC <sup>B</sup> |          |
| CS6798  | Mir-0 | Miramare/Trieste, Italy     | FRI              | FLC <sup>A</sup> |          |
| CS6799* | Mt-0  | Martuba/Cyrenaika, Libya    | FRI <sup>A</sup> | FLC <sup>A</sup> | Col-type |
| CS6800* | Mz-0  | Merzhausen/Ts., Germany     | FRI <sup>A</sup> | FLC <sup>B</sup> |          |
| CS6801  | Mz-0  | Merzhausen/Ts., Germany     | FRI <sup>A</sup> | FLC <sup>A</sup> | Col-type |
| CS6802  | Na-1  | Nantes, France              | FRI <sup>A</sup> | FLC <sup>B</sup> |          |
| CS6803* | Nc-1  | Ville-en-Vermois, France    | FRI <sup>A</sup> | FLC <sup>A</sup> | Col-type |
| CS6804  | Nie-0 | Niederlauken/Ts., Germany   | FRI <sup>A</sup> | FLC <sup>B</sup> |          |
| CS6805* | No-0  | Nossen, Germany             | FRI <sup>A</sup> | FLC <sup>A</sup> | Ler-type |
| CS6807* | Nok-0 | Noordwijk, Netherlands      | FRI              | FLC <sup>B</sup> |          |
| CS6808  | Nok-1 | Noordwijk, Netherlands      | FRI              | FLC <sup>B</sup> |          |
| CS6809  | Nok-2 | Noordwijk, Netherlands      | FRI <sup>A</sup> | FLC <sup>B</sup> |          |
| CS6810  | Nok-3 | Noordwijk, Netherlands      | FRI              | FLC <sup>B</sup> |          |
| CS6811* | Nw-0  | Neuweilnau, Germany         | FRI <sup>A</sup> | FLC <sup>B</sup> |          |
| CS6812  | Nw-1  | Neuweilnau, Germany         | FRI <sup>A</sup> | FLC <sup>B</sup> |          |
| CS6813  | Nw-2  | Neuweilnau, Germany         | FRI <sup>A</sup> | FLC <sup>B</sup> |          |
| CS6814  | Nw-3  | Neuweilnau, Germany         | FRI <sup>A</sup> | FLC <sup>B</sup> |          |
| CS6815  | Nw-4  | Neuweilnau, Germany         |                  | FLC <sup>B</sup> |          |
| CS6816* | Ob-0  | Oberursel/Hasen, Germany    | FRI <sup>A</sup> | FLC <sup>B</sup> |          |
| CS6818  | Ob-2  | Oberursel/Friedhof, Germany | FRI <sup>A</sup> | FLC <sup>B</sup> |          |
| CS6820  | Old-1 | Oldenburg, Germany          | FRI <sup>A</sup> | FLC <sup>B</sup> |          |
| CS6821  | Old-2 | Oldenburg, Germany          | FRI <sup>A</sup> | FLC <sup>B</sup> |          |
| CS6822  | Or-0  | Oranienstein, Germany       | FRI              | FLC <sup>B</sup> |          |
| CS6823* | Ove-0 | Ovelgoenne, Germany         | FRI <sup>A</sup> | FLC <sup>B</sup> |          |
| CS6824* | Oy-0  | Oystese, Norway             | FRI <sup>A</sup> | FLC <sup>A</sup> |          |
| CS6825* | Pa-1  | Palermo, Italy              | FRI              | FLC <sup>A</sup> |          |
| CS6826  | Pa-2  | Palermo, Italy              | FRI <sup>A</sup> | FLC <sup>A</sup> | Col-type |
| CS6827* | Pa-3  | Palermo, Italy              | FRI <sup>A</sup> | FLC <sup>B</sup> |          |
| CS6828* | Per-1 | Perm, Russia                | FRI              | FLC <sup>B</sup> |          |

|         |        |                                               |                  |                  |                      |
|---------|--------|-----------------------------------------------|------------------|------------------|----------------------|
| CS6831  | Pf-0   | Pfrondorf, Germany                            | FRI <sup>A</sup> | FLC <sup>B</sup> |                      |
| CS6832* | Pi-0   | Pitztal/Tirol, Austria                        | FRI <sup>A</sup> | FLC <sup>B</sup> |                      |
| CS6833  | Pi-2   | Pitztal/Tirol, Austria                        | FRI <sup>A</sup> | FLC <sup>B</sup> |                      |
| CS6834* | Pla-0  | Playa de Aro, Spain                           | FRI              | FLC <sup>A</sup> |                      |
| CS6835  | Pla-1  | Playa de Aro, Spain                           | FRI              | FLC <sup>A</sup> |                      |
| CS6836  | Pla-3  | Playa de Aro, Spain                           | FRI              | FLC <sup>A</sup> |                      |
| CS6837  | Pla-4  | Playa de Aro, Spain                           | FRI              | FLC <sup>A</sup> |                      |
| CS6838  | Pn-0   | Pontivy, France                               | FRI              | FLC <sup>A</sup> |                      |
| CS6839* | Po-0   | Poppelsdorf, Germany                          | FRI              | FLC <sup>B</sup> |                      |
| CS6840  | Po-1   | Poppelsdorf, Germany                          | FRI              | FLC <sup>A</sup> | Da-type and Col-type |
| CS6841* | Pr-0   | Frankfurt-Praunheim, Germany                  | FRI <sup>A</sup> | FLC <sup>B</sup> |                      |
| CS6842  | Pog-0  | Point Grey, B.C, Canada                       | FRI <sup>A</sup> | FLC <sup>A</sup> |                      |
| CS6843  | Pt-0   | Poetrau/Lauenburg, Germany                    | FRI <sup>A</sup> | FLC <sup>B</sup> |                      |
| CS6845  | Rd-0   | Rodenbach/Dill, Germany                       | FRI <sup>A</sup> | FLC <sup>B</sup> |                      |
| CS6846* | Rak-2  | Raksice nr. Moravsky, Czech.                  | FRI <sup>A</sup> | FLC <sup>A</sup> |                      |
| CS6847  | Rou-0  | Rouen, France                                 | FRI <sup>A</sup> | FLC <sup>A</sup> |                      |
| CS6848  | Rsch-0 | Rschew/Starize, Russia                        | FRI              | FLC <sup>B</sup> |                      |
| CS6850  | Rsch-4 | Rschew/Starize, Russia                        | FRI <sup>A</sup> | FLC <sup>B</sup> |                      |
| CS6852  | Se-0   | San Eleno, Spain                              |                  | FLC <sup>A</sup> |                      |
| CS6853  | Sei-0  | Seis am Schlern, Italy                        | FRI <sup>A</sup> | FLC <sup>B</sup> |                      |
| CS6854* | Sap-0  | Slapy, Czechoslovakia                         | FRI              | FLC <sup>A</sup> | Da-type and Col-type |
| CS6855* | Sf-1   | San Feliu, Spain                              | FRI              | FLC <sup>A</sup> |                      |
| CS6856* | Sav-0  | Slavice, Czechoslovakia                       | FRI <sup>A</sup> | FLC <sup>A</sup> | Ler-type             |
| CS6857  | Sf-2   | San Feliu, Spain                              | FRI              | FLC <sup>A</sup> |                      |
| CS6858  | Sg-1   | St. Georgen, Germany                          | FRI <sup>A</sup> | FLC <sup>A</sup> |                      |
| CS6859  | Sg-2   | St. Georgen, Germany                          | FRI <sup>A</sup> | FLC <sup>A</sup> |                      |
| CS6860  | Sh-0   | Schwiegershausen, Germany                     | FRI <sup>A</sup> | FLC <sup>A</sup> | Col-type             |
| CS6861  | Si-0   | Siegen, Germany                               | FRI <sup>A</sup> | FLC <sup>A</sup> |                      |
| CS6862  | Sp-0   | Berlin/Spandau, Germany                       | FRI              | FLC <sup>A</sup> | †                    |
| CS6863  | St-0   | Stockholm, Sweden                             |                  | FLC <sup>A</sup> | Col-type             |
| CS6864  | Ste-0  | Stendal, Germany                              | FRI              | FLC <sup>A</sup> |                      |
| CS6865* | Stw-0  | Stobowa/Orel, Russia<br>Tabor, Czechoslovakia |                  | FLC <sup>A</sup> | Da-type and Col-type |
| CS6867* | Ta-0   |                                               | FRI              | FLC <sup>A</sup> | Col-type             |
| CS6871  | Ts-5   | Tossa del Mar, Spain                          | FRI              | FLC <sup>A</sup> |                      |
| CS6872  | Ts-6   | Tossa del Mar, Spain                          | FRI              | FLC <sup>A</sup> |                      |
| CS6873  | Ts-7   | Tossa del Mar, Spain                          | FRI <sup>A</sup> | FLC <sup>B</sup> |                      |
| CS6875  | Tu-0   | Turin, Italy                                  | FRI <sup>A</sup> | FLC <sup>B</sup> |                      |
| CS6876* | Tu-1   | Turin, Italy                                  | FRI <sup>A</sup> | FLC <sup>B</sup> |                      |
| CS6879  | Uk-1   | Umkirch, Germany                              |                  | FLC <sup>A</sup> |                      |
| CS6880  | Uk-3   | Umkirch, Germany                              | FRI <sup>A</sup> | FLC <sup>A</sup> |                      |



|         |                   |                                          |                        |                        |                 |
|---------|-------------------|------------------------------------------|------------------------|------------------------|-----------------|
| CS6881  | <i>Uk-2</i>       | <i>Umkirch, Germany</i>                  | <i>FRI<sup>A</sup></i> | <i>FLC<sup>A</sup></i> |                 |
| CS6882  | <i>Uk-4</i>       | <i>Umkirch, Germany</i>                  | <i>FRI<sup>A</sup></i> | <i>FLC<sup>A</sup></i> |                 |
| CS6883  | <i>Vi-0</i>       | <i>Vilbel/Taunus, Germany</i>            |                        | <i>FLC<sup>B</sup></i> |                 |
| CS6884  | <i>Van-0</i>      | <i>U. of British Columbia, Canada</i>    | <i>FRI</i>             | <i>FLC<sup>A</sup></i> | <i>Col-type</i> |
| CS6885  | <i>Wa-1</i>       | <i>Warschau, Poland</i>                  | <i>FRI</i>             | <i>FLC<sup>B</sup></i> |                 |
| CS6886  | <i>Wc-1</i>       | <i>Westercele, Germany</i>               | <i>FRI<sup>A</sup></i> | <i>FLC<sup>A</sup></i> | <i>Col-type</i> |
| CS6887  | <i>Wc-2</i>       | <i>Westercele, Germany</i>               | <i>FRI<sup>A</sup></i> | <i>FLC<sup>A</sup></i> | <i>Col-type</i> |
| CS6888  | <i>Wil-1</i>      | <i>Wilna/Litauen, Russia</i>             | <i>FRI</i>             | <i>FLC<sup>A</sup></i> |                 |
| CS6889  | <i>Wil-2</i>      | <i>Wilna/Litvanian SSR, Russia</i>       | <i>FRI</i>             | <i>FLC<sup>A</sup></i> |                 |
| CS6890  | <i>Wil-3</i>      | <i>Wilna/Litvanian SSR, Russia</i>       | <i>FRI</i>             | <i>FLC<sup>A</sup></i> |                 |
| CS6892* | <i>Wt-1</i>       | <i>Wietze, Germany</i>                   | <i>FRI<sup>A</sup></i> | <i>FLC<sup>A</sup></i> | <i>Col-type</i> |
| CS6893  | <i>Wt-2</i>       | <i>Wietze, Germany</i>                   | <i>FRI<sup>A</sup></i> | <i>FLC<sup>A</sup></i> |                 |
| CS6894  | <i>Wt-3</i>       | <i>Wietze, Germany</i>                   | <i>FRI<sup>A</sup></i> | <i>FLC<sup>A</sup></i> |                 |
| CS6895  | <i>Wt-4</i>       | <i>Wietze, Germany</i>                   | <i>FRI<sup>A</sup></i> | <i>FLC<sup>A</sup></i> |                 |
| CS6896  | <i>Wt-5</i>       | <i>Wietze, Germany</i>                   | <i>FRI<sup>A</sup></i> | <i>FLC<sup>B</sup></i> |                 |
| CS6897  | <i>Wu-0</i>       | <i>Wurzburg, Germany</i>                 | <i>FRI<sup>A</sup></i> | <i>FLC<sup>B</sup></i> |                 |
| CS6898  | <i>X-0</i>        |                                          | <i>FRI<sup>A</sup></i> | <i>FLC<sup>B</sup></i> |                 |
| CS6899  | <i>XX-0</i>       |                                          |                        | <i>FLC<sup>B</sup></i> |                 |
| CS6900  | <i>XXX-0</i>      |                                          | <i>FRI<sup>A</sup></i> | <i>FLC<sup>A</sup></i> | <i>Col-type</i> |
| CS6902  | <i>Zu-0</i>       | <i>Zurich, Switzerland</i>               | <i>FRI</i>             | <i>FLC<sup>A</sup></i> |                 |
| CS6903  | <i>Zu-1</i>       | <i>Zurich, Switzerland</i>               | <i>FRI<sup>A</sup></i> | <i>FLC<sup>A</sup></i> |                 |
| CS6904  | <i>HI-3</i>       | <i>Holtensen, Germany</i>                | <i>FRI<sup>A</sup></i> | <i>FLC<sup>A</sup></i> |                 |
| CS6905  | <i>Hs-0</i>       | <i>Hannover/Stroehen, Germany</i>        | <i>FRI<sup>A</sup></i> | <i>FLC<sup>B</sup></i> |                 |
| CS6906  | <i>Is-1</i>       | <i>Isenburg/Neuwied, Germany</i>         | <i>FRI<sup>A</sup></i> | <i>FLC<sup>B</sup></i> |                 |
| CS6911  | <i>Li-10</i>      | <i>Limburg, Germany</i>                  |                        | <i>FLC<sup>B</sup></i> |                 |
| CS6914  | <i>Mv-0</i>       | <i>Martha's Vineyard, MA, USA</i>        | <i>FRI</i>             | <i>FLC<sup>A</sup></i> |                 |
| CS6918* | <i>Te-0</i>       | <i>Tenela, Finland</i>                   | <i>FRI</i>             | <i>FLC<sup>A</sup></i> | †               |
| CS6920* | <i>WI-0</i>       | <i>Wildbad, Germany</i>                  | <i>FRI<sup>A</sup></i> | <i>FLC<sup>B</sup></i> |                 |
| CS6922* | <i>Nd-1</i>       | <i>Niederzenz, Germany</i>               | <i>FRI<sup>A</sup></i> | <i>FLC<sup>A</sup></i> | <i>Col-type</i> |
| CS6923  | <i>Ema-1</i>      | <i>East Malling, U.K.</i>                | <i>FRI<sup>A</sup></i> | <i>FLC<sup>A</sup></i> |                 |
| CS6924* | <i>Ws-3</i>       | <i>Wassilewskija</i>                     | <i>FRI<sup>A</sup></i> | <i>FLC<sup>B</sup></i> |                 |
| CS6925  | <i>Wei-1</i>      | <i>Weiningen, Switzerland</i>            |                        | <i>FLC<sup>B</sup></i> | †               |
| CS6926  | <i>Tsu-1</i>      | <i>Tsu, Japan</i>                        | <i>FRI<sup>A</sup></i> | <i>FLC<sup>B</sup></i> |                 |
| CS6927  | <i>Rld-2</i>      | <i>Rschew, Russia</i>                    |                        | <i>FLC<sup>B</sup></i> | †               |
| CS6928  | <i>Ler-1</i>      | <i>Landsberg an der Warthe, Poland</i>   | <i>FRI<sup>A</sup></i> | <i>FLC<sup>A</sup></i> | <i>Ler-type</i> |
| CS6929* | <i>Oy-1</i>       | <i>Oystese, Norway</i>                   |                        | <i>FLC<sup>A</sup></i> |                 |
| CS6930  | <i>Col-5(gII)</i> | <i>Landsberg an der Warthe, Poland</i>   |                        | <i>FLC<sup>A</sup></i> | <i>Col-type</i> |
| CS8026  | <i>Tol-6</i>      | <i>Toledo, OH, USA</i>                   |                        | <i>FLC<sup>A</sup></i> |                 |
| CS8141  | <i>ENF</i>        | <i>near Hartford, CT, USA</i>            |                        | <i>FLC<sup>A</sup></i> |                 |
| CS8143  | <i>WAR</i>        | <i>Lincoln Woods State Park, RI, USA</i> | <i>FRI<sup>A</sup></i> | <i>FLC<sup>B</sup></i> | †               |
| CS8155  | <i>Col-6/gII</i>  | <i>Landsberg an der Warthe, Poland</i>   |                        | <i>FLC<sup>A</sup></i> | <i>Col-type</i> |

Accessions in bold were sequenced for the complete *FLC* region. Accessions in italics were genotyped for *FLC* SNPs with dCAPS. Accessions marked with an asterisk belong to a single, unstratified population based on a Bayesian analysis (1) using 79 AFLP loci (2); these accessions were included in phenotypic association tests. Accessions with a dagger in the Insertion column could not be scored for presence or absence of a Da-type insertion.

1. Pritchard, J. K., Stephens, M. and Donnelly, P. (2000) *Genetics* **155**, 945-959.
2. Sharbel, T.F., Haubold, B. and Mitchell-Olds, T. (2000) *Mol. Ecol.* **9**, 2108-2118.
