# Supplementary material
Source: PubMed Central journal article supplement (PMC524852)

**A** *FRI* background

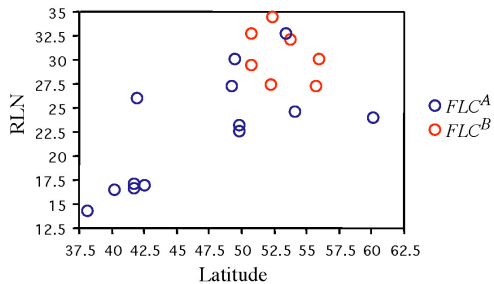

**B** *FRI<sup>Δ</sup>* background

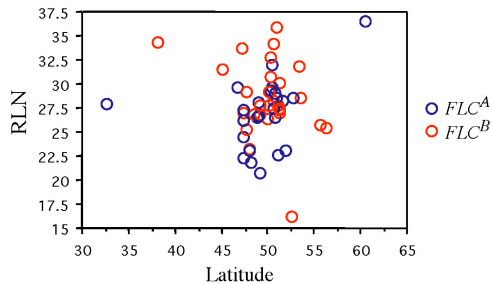

**C** *FRI* background

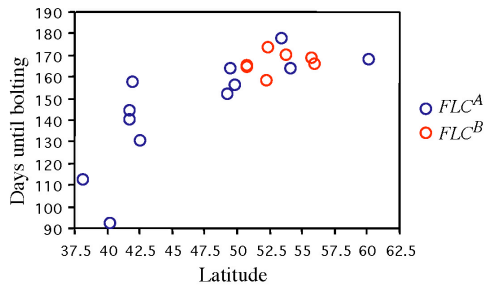

**D** *FRI<sup>Δ</sup>* background

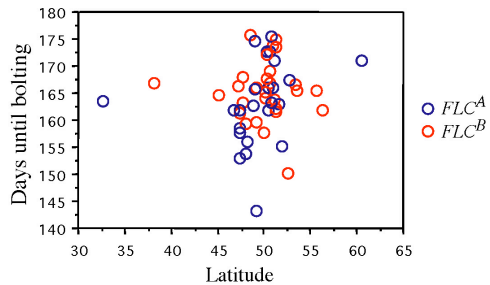

Supplement: pnas_101_44_15670__11.pdf [file pnas_101_44_15670__11.pdf]

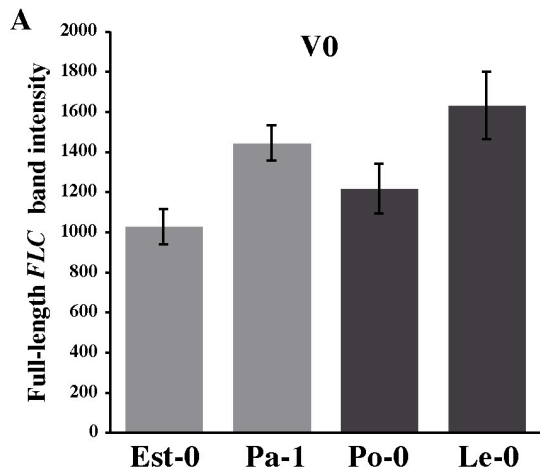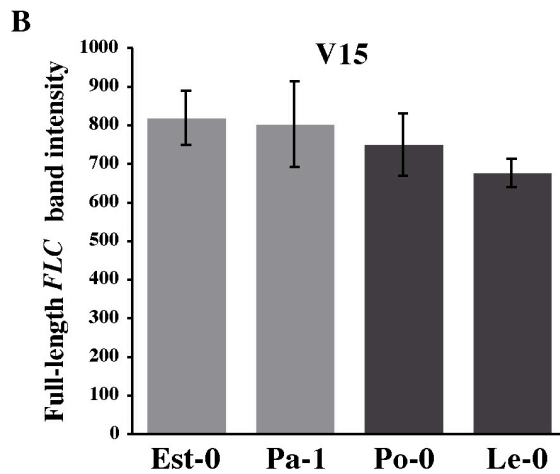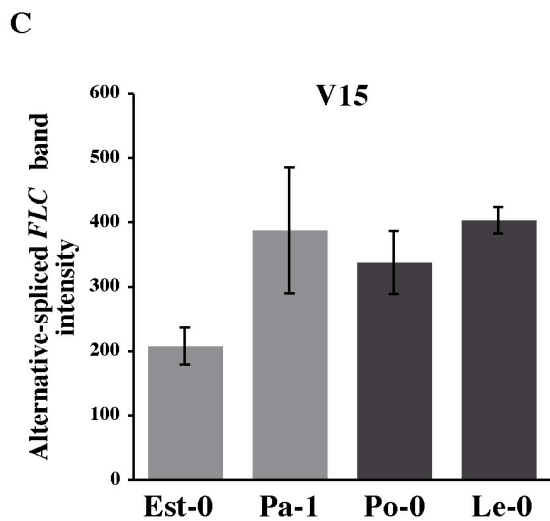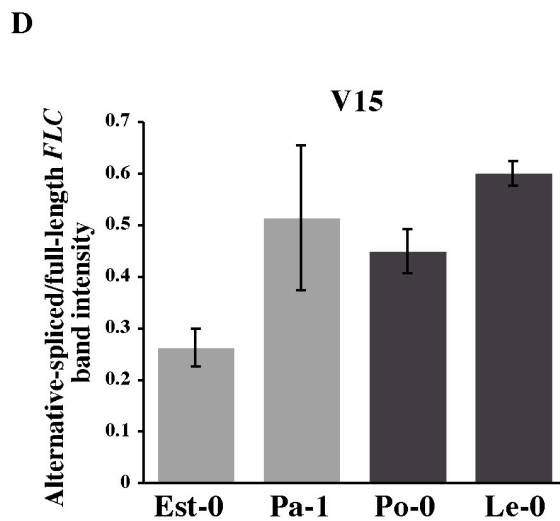

Supplement: pnas_101_44_15670__13.pdf [file pnas_101_44_15670__13.pdf]

A

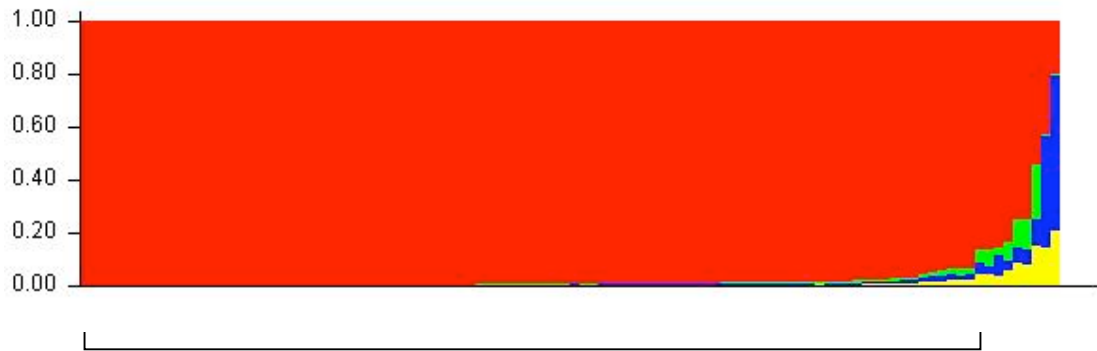

unstructured set

**B**

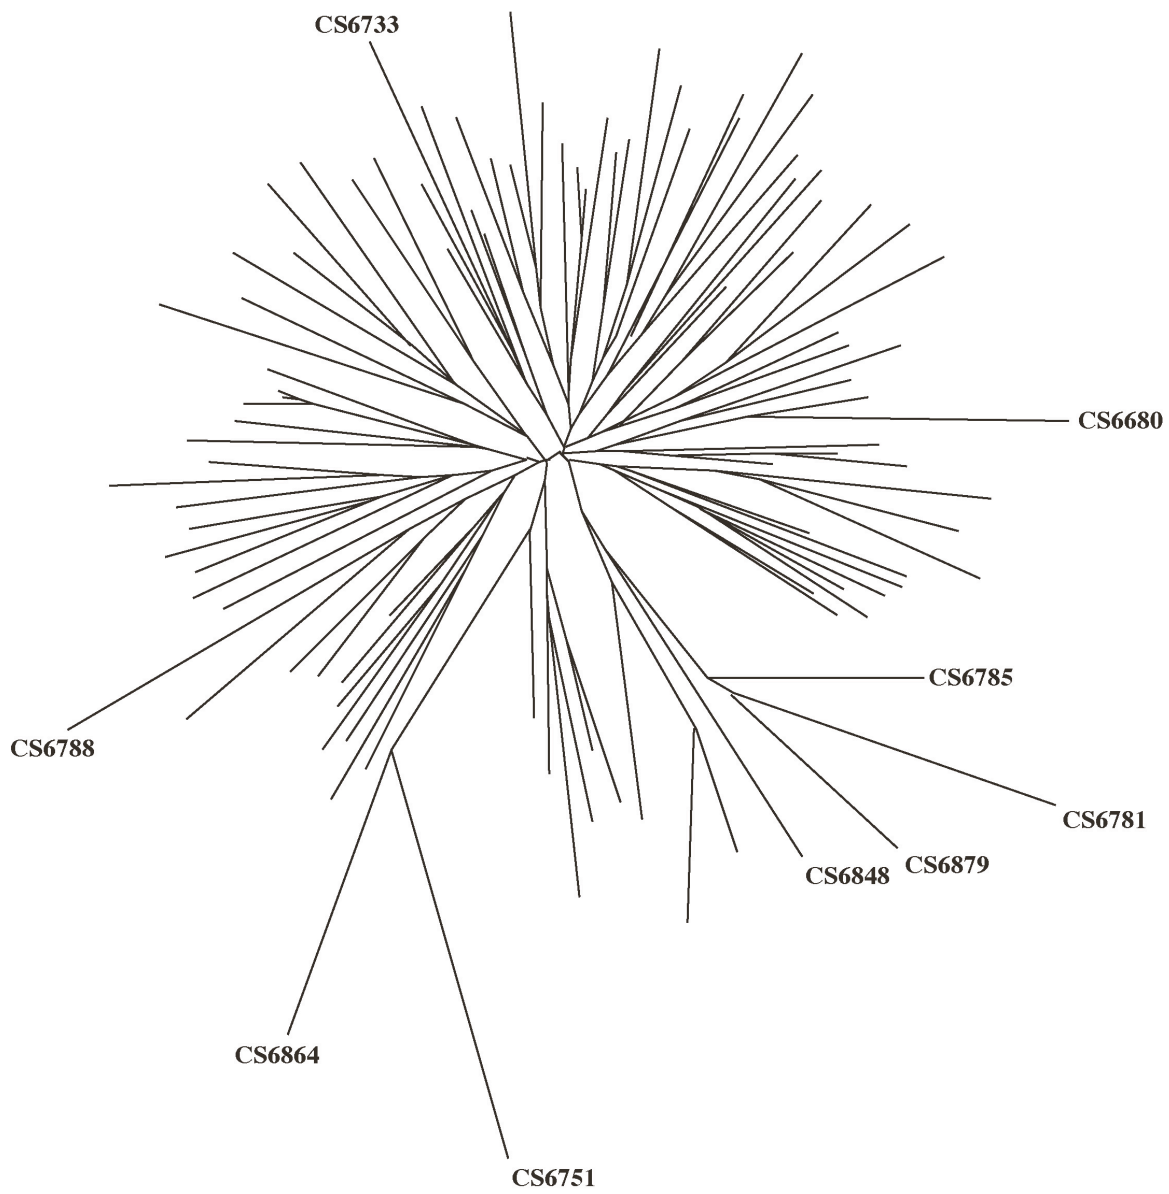

Supplement: pnas_101_44_15670__5.pdf [file pnas_101_44_15670__5.pdf]

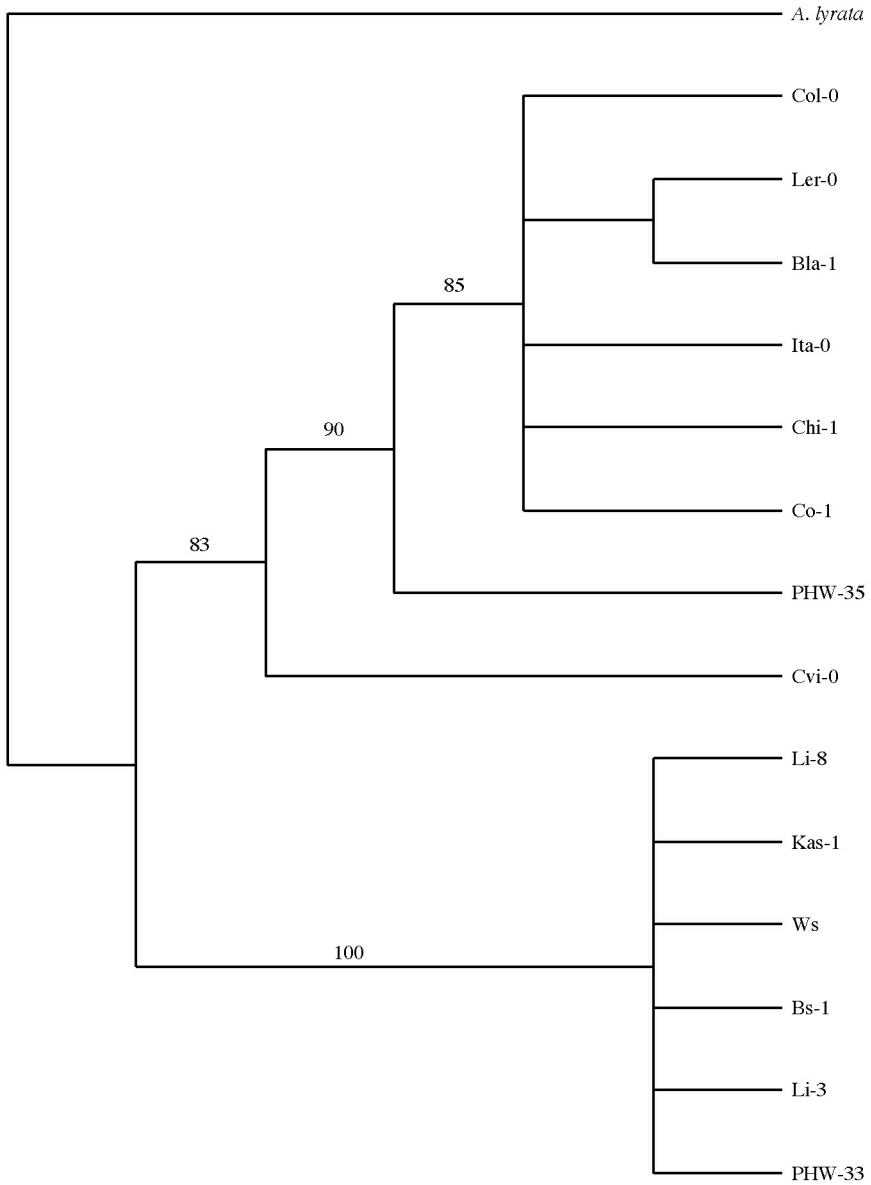

Supplement: pnas_101_44_15670__6.pdf [file pnas_101_44_15670__6.pdf]
